# Supplementary material for: Smilax weniae, a New Species of Smilacaceae from Limestone Areas Bordering Guizhou and Guangxi, China
Source: MDPI journal article supplement (doi:10.3390/plants11081032), 2022-04-11
Supplement: s1 [file s1]

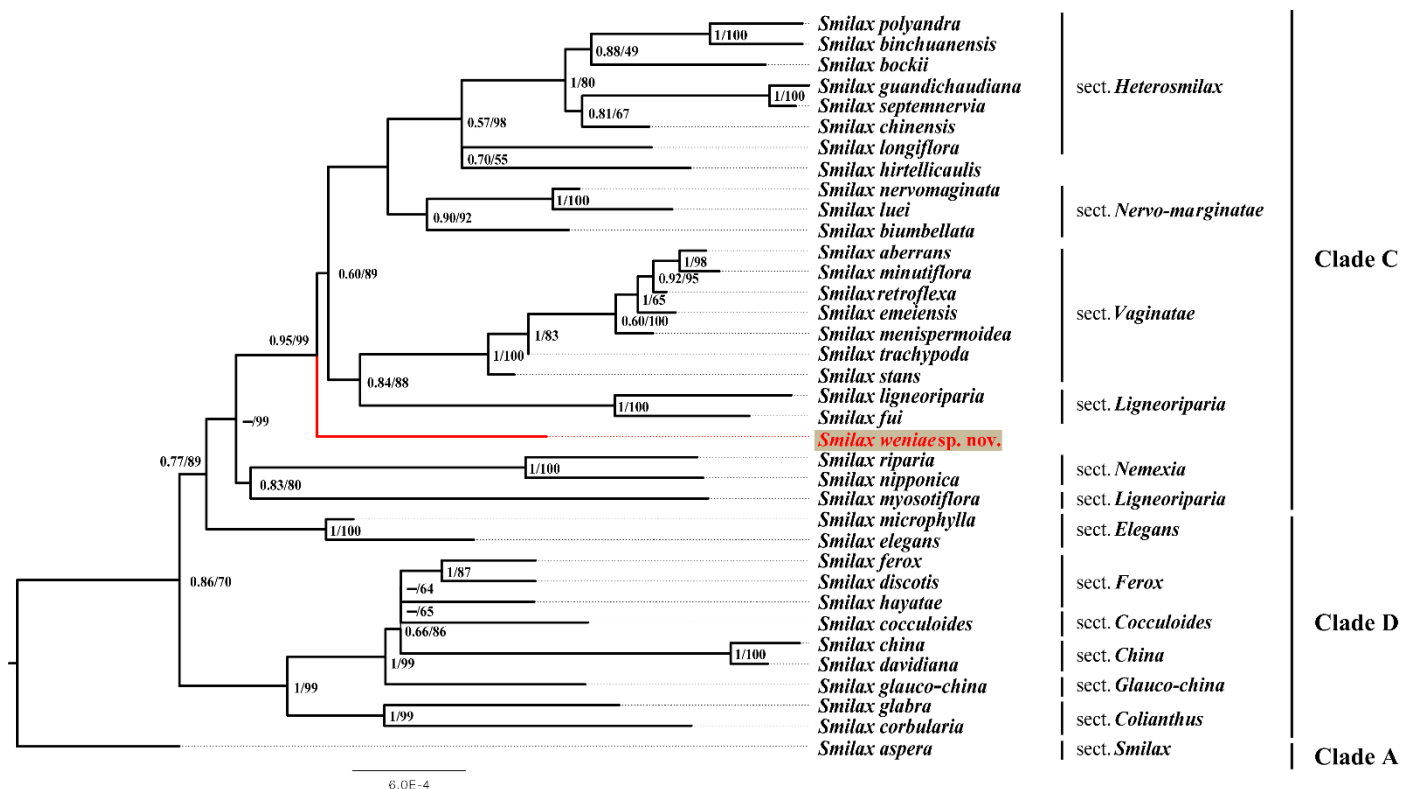

**Figure S1.** Maximum likelihood phylogram of the ptDNA of *Smilax weniæ* and 34 other *Smilax* species, representing an Old World Smilacaceae clade. Posterior probabilities (PP > 0.50) and bootstrap values (BS > 50%) based on Bayesian and maximum likelihood (ML) analyses are shown near the branches. Clade information adopted from Qi et al.[1].

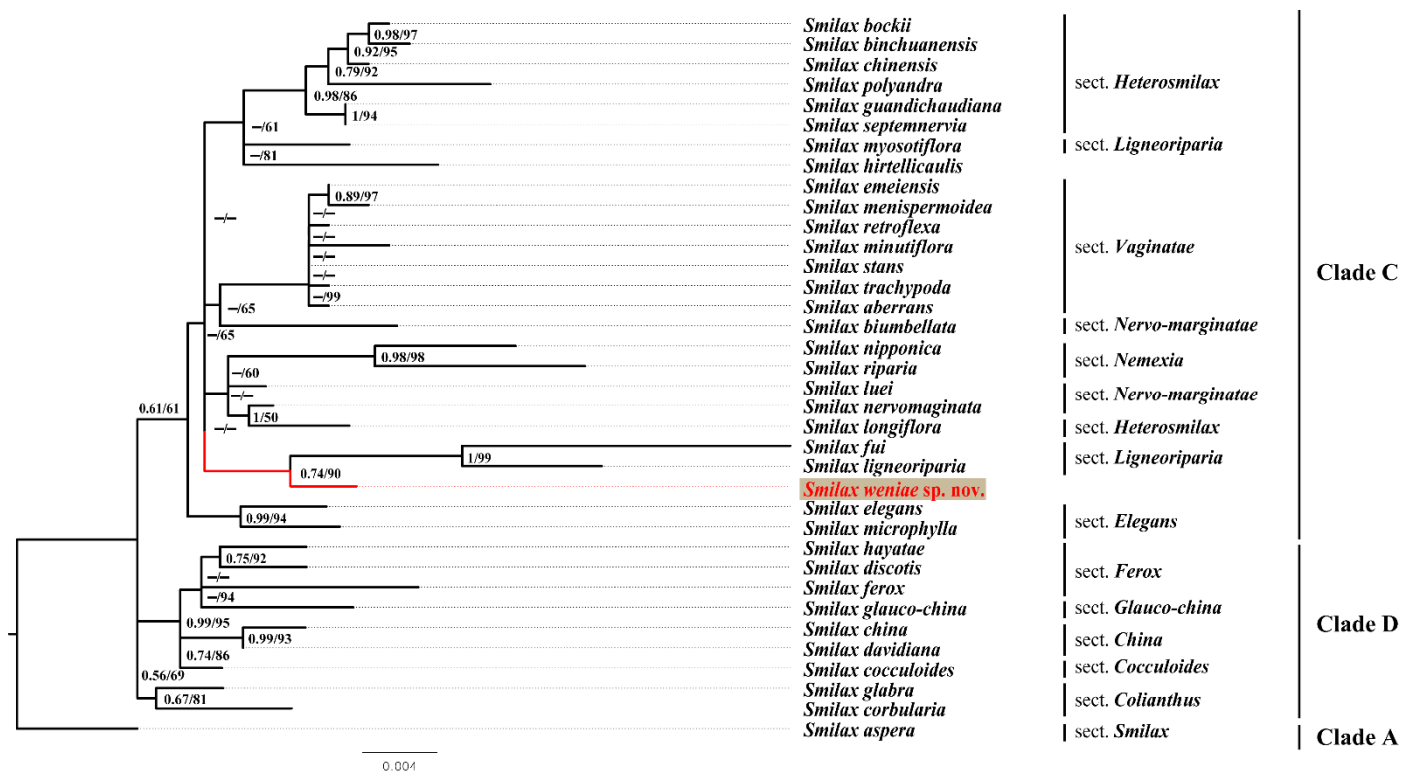

**Figure S2.** Maximum likelihood phylogram of the nrITS of *Smilax weniæ* and 34 other *Smilax* species, representing an Old World Smilacaceae clade. Posterior probabilities (PP > 0.50) and bootstrap values (BS > 50%) based on Bayesian and maximum likelihood (ML) analyses are shown near the branches. Clade information adopted from Qi et al.[1].

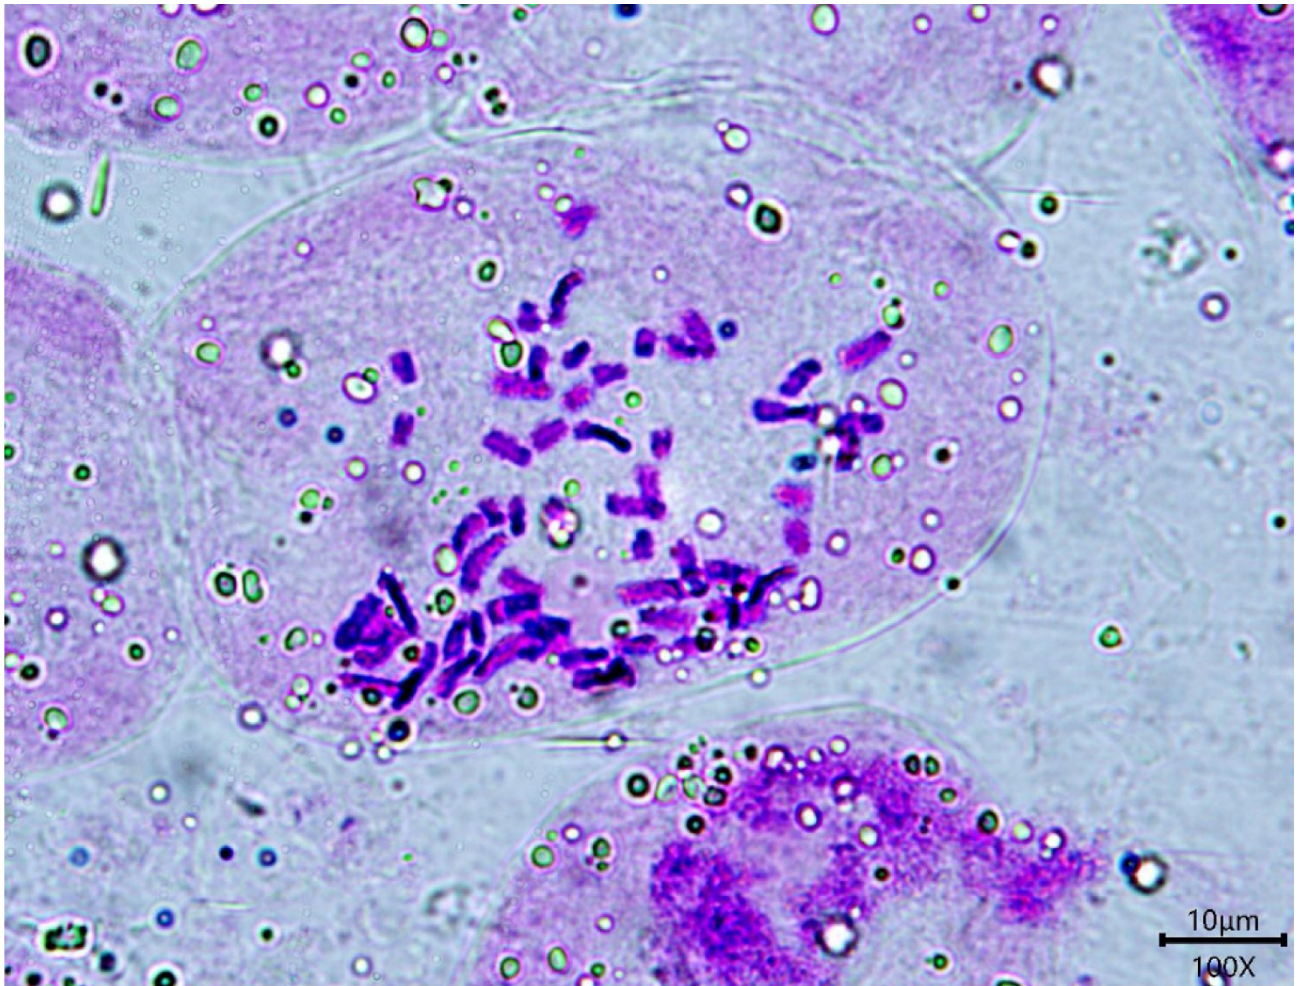

**Figure S3.** Mitotic chromosomes of *Smilax weniæ*. The most probable basic chromosome number seems to be  $2n = 60$ .
